# Supplementary material
Source: PubMed Central journal article supplement (PMC8901623)
Supplement: 41418_2021_881_MOESM1_ESM.pdf [file 41418_2021_881_MOESM1_ESM.pdf]

*Supplementary information for:*

*Therapeutic potential of Nlrp1 inflammasome, Caspase-1, or Caspase-6 against Alzheimer disease cognitive impairment*

*Joseph Flores<sup>1</sup>, Anastasia Noël<sup>1</sup>, Marie-Lyne Fillion<sup>1</sup>, Andréa C. LeBlanc<sup>1,2 \*</sup>*

<sup>1</sup>Lady Davis Institute for Medical Research, Jewish General Hospital, 3755 Chemin Côte Ste Catherine, Montreal, Quebec, Canada H3T 1E2

<sup>2</sup>Department of Neurology and Neurosurgery, McGill University, 3755 Rue University, Montreal, Quebec, Canada, H3T 1E2

**\*Corresponding author:** Andréa LeBlanc PhD, Lady Davis Institute for Medical Research, Jewish General Hospital, 3755 Chemin Côte Ste Catherine, Montreal, QC, Canada H3T 1E2. Tel.: +1 (514) 340 8222 ext 25303; e-mail: [andrea.leblanc@mcgill.ca](mailto:andrea.leblanc@mcgill.ca)

**Competing interests:** The authors declare no conflict of interest

**Table S1. Behavioral data comparing J20 versus genetically ablated J20, WT versus genetically ablated WT, and J20 and genetically ablated J20 versus WT mice.**

| Nlrp1, Casp1, Casp6 genetically ablated J20 vs. J20 mice |                      | J20 | J20/Nlrp1 <sup>-/-</sup> | J20/Casp1 <sup>-/-</sup> | J20/Casp6 <sup>-/-</sup> | J20/Nlrp1 <sup>+/-</sup> | J20/Casp1 <sup>+/-</sup> | J20/Casp6 <sup>+/-</sup> |
|----------------------------------------------------------|----------------------|-----|--------------------------|--------------------------|--------------------------|--------------------------|--------------------------|--------------------------|
| NOR                                                      | Mice (n)             | 15  | 10                       | 13                       | 11                       | 14                       | 11                       | 11                       |
|                                                          | Discrimination index |     | ▲<br>(p<0.0001)          | ▲<br>(p<0.0001)          | ▲<br>(p<0.0001)          | ▲<br>(p<0.0001)          | ▲<br>(p<0.0001)          | ▲<br>(p<0.0001)          |
| <b>Barnes Maze</b>                                       | Mice (n)             | 13  | 10                       | 13                       | 9                        | 12                       | 11                       | 10                       |
| Learning acquisition                                     | Primary errors       |     | ▼<br>(p=0.0017)          | ▼<br>(p=0.02)            | ▼<br>(p=0.03)            | ▼<br>(p=0.01)            | =                        | =                        |
|                                                          | Primary latency      |     | =                        | =                        | =                        | =                        | =                        | =                        |
| Probe test                                               | Primary errors       |     | =                        | ▼<br>(p=0.0016)          | ▼<br>(p=0.03)            | =                        | =                        | =                        |
|                                                          | Primary latency      |     | =                        | =                        | =                        | =                        | =                        | =                        |
|                                                          | Target preference    |     | no difference            |

  

| Nlrp1, Casp1, Casp6 genetically ablated WT vs. WT mice |                      | WT | WT/Nlrp1 <sup>-/-</sup> | WT/Casp1 <sup>-/-</sup> | WT/Casp6 <sup>-/-</sup> | WT/Nlrp1 <sup>+/-</sup> | WT/Casp1 <sup>+/-</sup> | WT/Casp6 <sup>+/-</sup> |
|--------------------------------------------------------|----------------------|----|-------------------------|-------------------------|-------------------------|-------------------------|-------------------------|-------------------------|
| NOR                                                    | Mice (n)             | 16 | 13                      | 12                      | 12                      | 12                      | 13                      | 11                      |
|                                                        | Discrimination index |    | =                       | =                       | =                       | =                       | =                       | =                       |
| <b>Barnes Maze</b>                                     | Mice (n)             | 16 | 13                      | 12                      | 12                      | 12                      | 12                      | 11                      |
| Learning acquisition                                   | Primary errors       |    | =                       | =                       | =                       | =                       | =                       | =                       |
|                                                        | Primary latency      |    | =                       | =                       | =                       | =                       | =                       | =                       |
| Probe test                                             | Primary errors       |    | =                       | =                       | =                       | =                       | =                       | =                       |
|                                                        | Primary latency      |    | =                       | =                       | =                       | =                       | =                       | =                       |
|                                                        | Target preference    |    | no difference           |

  

| J20 and genetically ablated J20 vs. WT mice |                      | WT | J20          | J20/Nlrp1 <sup>-/-</sup> | J20/Casp1 <sup>-/-</sup> | J20/Casp6 <sup>-/-</sup> | J20/Nlrp1 <sup>+/-</sup> | J20/Casp1 <sup>+/-</sup> | J20/Casp6 <sup>+/-</sup> |
|---------------------------------------------|----------------------|----|--------------|--------------------------|--------------------------|--------------------------|--------------------------|--------------------------|--------------------------|
| NOR                                         | Mice (n)             | 16 | 15           | 10                       | 13                       | 11                       | 14                       | 11                       | 11                       |
|                                             | Discrimination index |    | ▼ (p=0.0001) | =                        | =                        | =                        | =                        | =                        | =                        |
| <b>Barnes Maze</b>                          | Mice (n)             | 16 | 13           | 10                       | 13                       | 9                        | 12                       | 11                       | 10                       |
| Learning acquisition                        | Primary errors       |    | ▼ (p=0.03)   | =                        | =                        | =                        | =                        | =                        | =                        |
|                                             | Primary latency      |    | =            | =                        | =                        | =                        | =                        | =                        | =                        |
| Probe test                                  | Primary errors       |    | NS p=0.06    | =                        | =                        | =                        | =                        | =                        | =                        |
|                                             | Primary latency      |    | =            | =                        | =                        | =                        | =                        | =                        | =                        |
|                                             | Target preference    |    | impaired     | no difference            |

Episodic memory was measured with novel object recognition (NOR) while spatial memory was measured with the Barnes maze. Mice numbers are indicated in each group of mice. Upward arrow (▲) represents increased value,

downward arrow (▼) represents decreased value, equal sign (=) represents unchanged value. Significant ( $p < 0.05$ ) or non-significant (NS) but close ( $0.1 > p > 0.05$ ) statistical p values are indicated below or next to arrows.

**Table S2. Iba1<sup>+</sup>-microglial and GFAP<sup>+</sup>-astrocyte immunostaining density comparing J20 and genetically ablated J20 versus WT, or genetically ablated J20 versus J20 in the hippocampus and cortex.**

**Hippocampus**

| vs. WT mice         |                                | WT              | J20             | J20/Nlrp1 <sup>-/-</sup> | J20/Casp1 <sup>-/-</sup> | J20/Casp6 <sup>-/-</sup> | J20/Nlrp1 <sup>+/-</sup> | J20/Casp1 <sup>+/-</sup> | J20/Casp6 <sup>+/-</sup> |
|---------------------|--------------------------------|-----------------|-----------------|--------------------------|--------------------------|--------------------------|--------------------------|--------------------------|--------------------------|
| <b>Iba1 vs WT</b>   | Mice (n)                       | 8               | 6               | 5                        | 6                        | 4                        | 8                        | 6                        | 6                        |
|                     | Iba1 <sup>+</sup> cell density |                 | ▲<br>(p<0.0001) | ▲<br>(p=0.0002)          | =                        | =                        | ▲ (p=0.002)              | =                        | ▲ (p=0.035)              |
| <b>GFAP vs WT</b>   | Mice (n)                       | 6               | 6               | 5                        | 6                        | 4                        | 6                        | 6                        | 6                        |
|                     | GFAP <sup>+</sup> density      |                 | =               | =                        | =                        | =                        | =                        | =                        | =                        |
| <b>vs. J20 mice</b> |                                |                 |                 |                          |                          |                          |                          |                          |                          |
| <b>Iba1 vs J20</b>  | Mice (n)                       | 8               | 6               | 5                        | 6                        | 4                        | 8                        | 6                        | 6                        |
|                     | Iba1 <sup>+</sup> cell density | ▼<br>(p<0.0001) |                 | ▼<br>(p=0.0006)          | ▼<br>(p<0.0001)          | ▼<br>(p<0.0001)          | ▼<br>(p<0.0001)          | ▼<br>(p<0.0001)          | ▼<br>(p<0.0001)          |
| <b>GFAP vs J20</b>  | Mice (n)                       | 6               | 6               | 5                        | 6                        | 4                        | 6                        | 6                        | 6                        |
|                     | GFAP <sup>+</sup> density      | =               |                 | =                        | =                        | =                        | =                        | =                        | =                        |

**Cortex**

| vs. WT mice         |                                | WT              | J20             | J20/Nlrp1 <sup>-/-</sup> | J20/Casp1 <sup>-/-</sup> | J20/Casp6 <sup>-/-</sup> | J20/Nlrp1 <sup>+/-</sup> | J20/Casp1 <sup>+/-</sup> | J20/Casp6 <sup>+/-</sup> |
|---------------------|--------------------------------|-----------------|-----------------|--------------------------|--------------------------|--------------------------|--------------------------|--------------------------|--------------------------|
| <b>Iba1 vs WT</b>   | Mice (n)                       | 8               | 6               | 5                        | 6                        | 4                        | 8                        | 6                        | 6                        |
|                     | Iba1 <sup>+</sup> cell density |                 | ▲<br>(p<0.0001) | ▲<br>(p=0.0001)          | =                        | =                        | ▲<br>(p<0.0001)          | =                        | ▲ (p=0.01)               |
| <b>GFAP vs WT</b>   | Mice (n)                       | 6               | 6               | 5                        | 6                        | 4                        | 6                        | 6                        | 6                        |
|                     | GFAP <sup>+</sup> density      |                 | =               | =                        | ▲ (p=0.03)               | =                        | =                        | =                        | =                        |
| <b>vs. J20 mice</b> |                                |                 |                 |                          |                          |                          |                          |                          |                          |
| <b>Iba1 vs J20</b>  | Mice (n)                       | 8               | 6               | 5                        | 6                        | 4                        | 8                        | 6                        | 6                        |
|                     | Iba1 <sup>+</sup> cell density | ▼<br>(p<0.0001) |                 | =                        | ▼<br>(p<0.0001)          | ▼<br>(p=0.002)           | =                        | ▼<br>(p<0.0001)          | ▼<br>(p<0.0001)          |
| <b>GFAP vs J20</b>  | Mice (n)                       | 6               | 6               | 5                        | 6                        | 4                        | 6                        | 6                        | 6                        |
|                     | GFAP <sup>+</sup> density      | =               |                 | =                        | =                        | =                        | =                        | =                        | =                        |

Immunohistochemical staining density was measured as described in methods. Upward arrow (▲) represents increased value, downward arrow (▼) represents decreased value, equal sign (=) represents unchanged value. Significant (p<0.05) statistical p values are indicated.



**Table S3. Immunohistochemical A $\beta$  staining density and ELISA-measured A $\beta$  in the hippocampus and cortex of genetically ablated J20 compared to J20 mice.**

| Hippocampus                                              |                              |          |                          |                          |                          |                          |                          |                          |   |
|----------------------------------------------------------|------------------------------|----------|--------------------------|--------------------------|--------------------------|--------------------------|--------------------------|--------------------------|---|
| Nlrp1, Casp1, Casp6 genetically ablated J20 vs. J20 mice |                              | J20      | J20/Nlrp1 <sup>-/-</sup> | J20/Casp1 <sup>-/-</sup> | J20/Casp6 <sup>-/-</sup> | J20/Nlrp1 <sup>+/-</sup> | J20/Casp1 <sup>+/-</sup> | J20/Casp6 <sup>+/-</sup> |   |
| Amyloid plaques                                          | Mice (n)                     | 6        | 5                        | 6                        | 4                        | 6                        | 6                        | 6                        |   |
|                                                          | A $\beta$ staining density   |          | ▼ (p=0.001)              | ▼ (p=0.001)              | ▼ (p=0.007)              | ▼ (p=0.001)              | ▼ (p=0.001)              | ▼ (p=0.004)              |   |
| <hr/>                                                    |                              |          |                          |                          |                          |                          |                          |                          |   |
| Amyloid protein levels (ELISA)                           |                              | Mice (n) | 6                        | 6                        | 6                        | 5                        | 6                        | 6                        | 6 |
| Formic acid soluble amyloid levels                       | Total A $\beta$              |          | ▼ (p<0.0001)             | ▼ (p=0.001)              | ▼ (p=0.03)               | ▼ (p=0.002)              | ▼ (p=0.0001)             | ▼ (p=0.0002)             |   |
|                                                          | A $\beta$ 38/total A $\beta$ |          | ▼ (p=0.005)              | =                        | =                        | =                        | ▼ (p=0.007)              | =                        |   |
|                                                          | A $\beta$ 40/total A $\beta$ |          | ▲ (p<0.0001)             | NS p=0.054               | =                        | =                        | ▲ (p=0.0003)             | ▲ (p=0.003)              |   |
|                                                          | A $\beta$ 42/total A $\beta$ |          | ▼ (p=0.0005)             | NS p=0.062               | =                        | =                        | ▼ (p=0.028)              | NS p=0.087               |   |
| RIPA soluble amyloid levels                              | Total A $\beta$              |          | ▼ (p=0.01)               | =                        | =                        | =                        | =                        | =                        |   |
|                                                          | A $\beta$ 38/total A $\beta$ |          | =                        | =                        | =                        | =                        | =                        | =                        |   |
|                                                          | A $\beta$ 40/total A $\beta$ |          | =                        | =                        | =                        | =                        | =                        | =                        |   |
|                                                          | A $\beta$ 42/total A $\beta$ |          | =                        | =                        | =                        | =                        | =                        | =                        |   |

  

| Cortex                                                   |                              |          |                          |                          |                          |                          |                          |                          |   |
|----------------------------------------------------------|------------------------------|----------|--------------------------|--------------------------|--------------------------|--------------------------|--------------------------|--------------------------|---|
| Nlrp1, Casp1, Casp6 genetically ablated J20 vs. J20 mice |                              | J20      | J20/Nlrp1 <sup>-/-</sup> | J20/Casp1 <sup>-/-</sup> | J20/Casp6 <sup>-/-</sup> | J20/Nlrp1 <sup>+/-</sup> | J20/Casp1 <sup>+/-</sup> | J20/Casp6 <sup>+/-</sup> |   |
| Amyloid plaques                                          | Mice (n)                     | 6        | 5                        | 6                        | 4                        | 6                        | 6                        | 6                        |   |
|                                                          | A $\beta$ staining density   |          | =                        | =                        | =                        | =                        | =                        | =                        |   |
| <hr/>                                                    |                              |          |                          |                          |                          |                          |                          |                          |   |
| Amyloid protein levels (ELISA)                           |                              | Mice (n) | 6                        | 6                        | 6                        | 5                        | 6                        | 6                        | 6 |
| Formic acid soluble amyloid levels                       | Total A $\beta$              |          | =                        | =                        | =                        | =                        | =                        | =                        |   |
|                                                          | A $\beta$ 38/total A $\beta$ |          | =                        | =                        | =                        | =                        | =                        | =                        |   |
|                                                          | A $\beta$ 40/total A $\beta$ |          | =                        | =                        | =                        | =                        | =                        | =                        |   |
|                                                          | A $\beta$ 42/total A $\beta$ |          | =                        | =                        | =                        | =                        | =                        | =                        |   |
| RIPA soluble amyloid levels                              | Total A $\beta$              |          | =                        | =                        | =                        | =                        | =                        | =                        |   |
|                                                          | A $\beta$ 38/total A $\beta$ |          | =                        | =                        | =                        | =                        | =                        | =                        |   |
|                                                          | A $\beta$ 40/total A $\beta$ |          | =                        | =                        | =                        | =                        | =                        | =                        |   |
|                                                          | A $\beta$ 42/total A $\beta$ |          | =                        | =                        | =                        | =                        | =                        | =                        |   |

Immunohistochemical staining density and ELISA were done as described in methods. Upward arrow (▲) represents increased value, downward arrow (▼) represents decreased value, equal sign (=) represents unchanged

value. Significant ( $p < 0.05$ ) or non-significant (NS) but close ( $0.1 > p > 0.05$ ), statistical p values are indicated. NS indicates not significant.

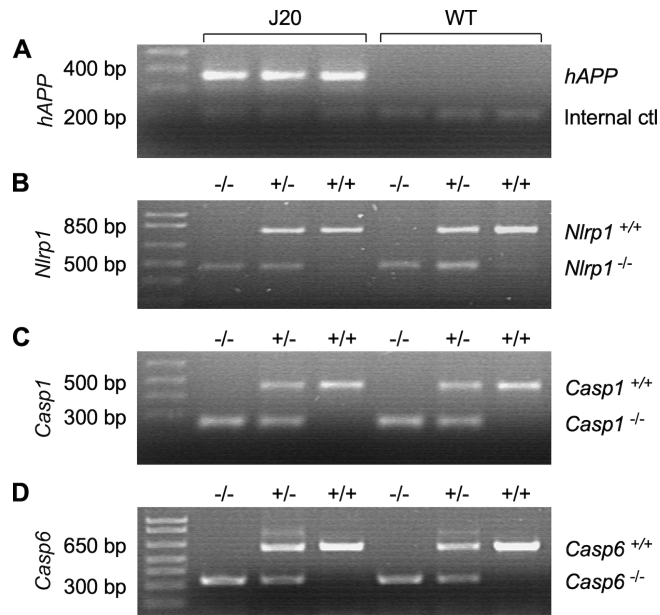

**Fig. S1.** *Nlrp1*, *Casp1*, or *Casp6* can be ablated from J20 and WT mice. Representative PCR of A 360 bp *hAPP*<sup>Sw/Ind</sup> transgene amplicon in J20 mice, B 490 bp null and 792 bp WT allele for *Nlrp1*, C 300 bp null and 500 bp WT allele for *Casp1*, and D 340 bp null and 620 bp WT allele for *Casp6*.

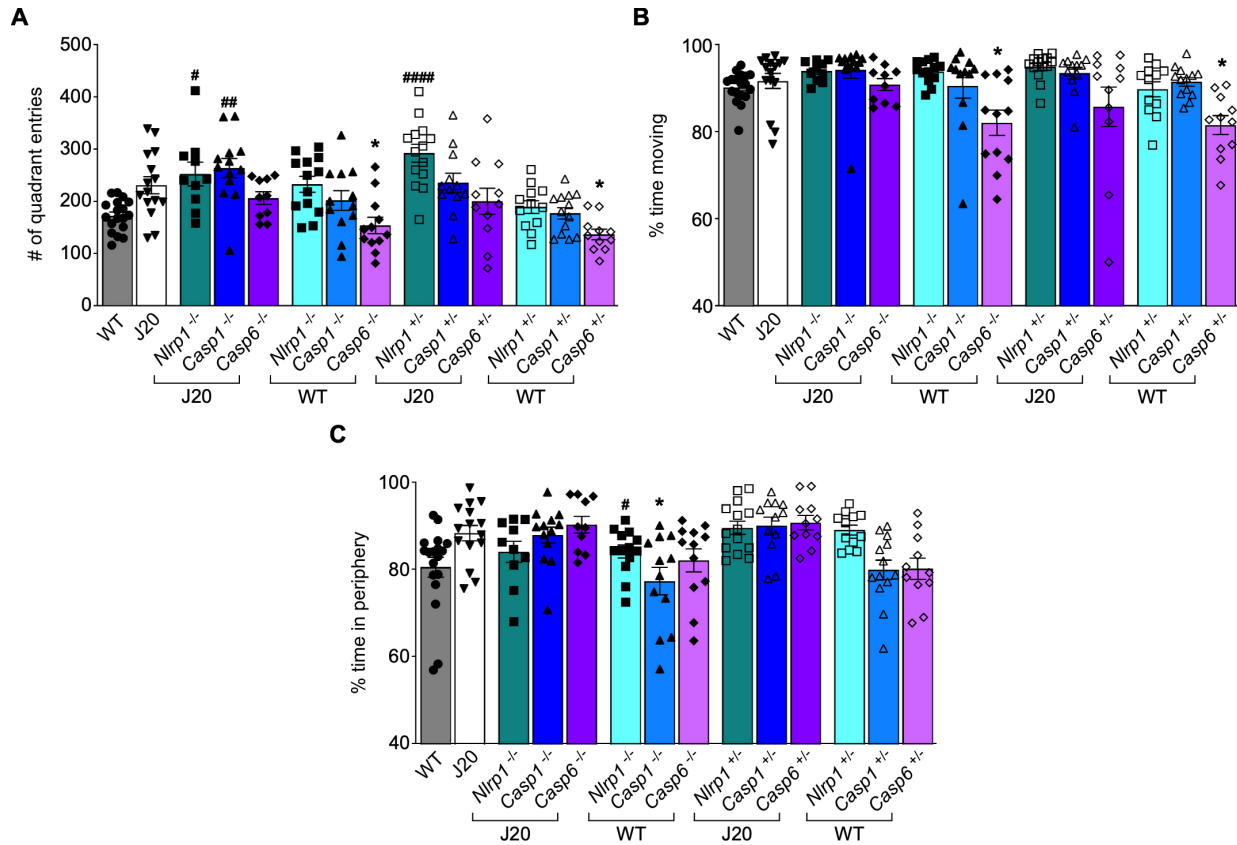

**Fig. S2. *Nlrp1*, *Casp1*, or *Casp6* genetic ablation does not alter locomotor behaviour.** Open field **A** number of quadrant entries [F = 7.779,  $p < 0.0001$ ], **B** percentage time moving [F = 4.745,  $p < 0.0001$ ], and **C** percentage time in periphery, indicative of thigmotaxis [F = 4.863,  $p < 0.0001$ ]. Bars represent mean  $\pm$  SEM of all mice per group; symbols denote performance of individual mice.  $n = 18$  WT, 15 J20, 10 J20/*Nlrp1*<sup>-/-</sup>, 13 J20/*Casp1*<sup>-/-</sup>, 10 J20/*Casp6*<sup>-/-</sup>, 13 WT/*Nlrp1*<sup>-/-</sup>, 12 WT/*Casp1*<sup>-/-</sup>, 12 WT/*Casp6*<sup>-/-</sup>, 14 J20/*Nlrp1*<sup>+/-</sup>, 12 J20/*Casp1*<sup>+/-</sup>, 11 J20/*Casp6*<sup>+/-</sup>, 12 WT/*Nlrp1*<sup>+/-</sup>, 13 WT/*Casp1*<sup>+/-</sup>, 11 WT/*Casp6*<sup>+/-</sup> for (A-C). One-way ANOVA, Bonferroni's post-hoc compared to WT (#) or J20 (\*). # or \*  $p < 0.05$ , ##  $p < 0.01$ , ####  $p < 0.0001$ .

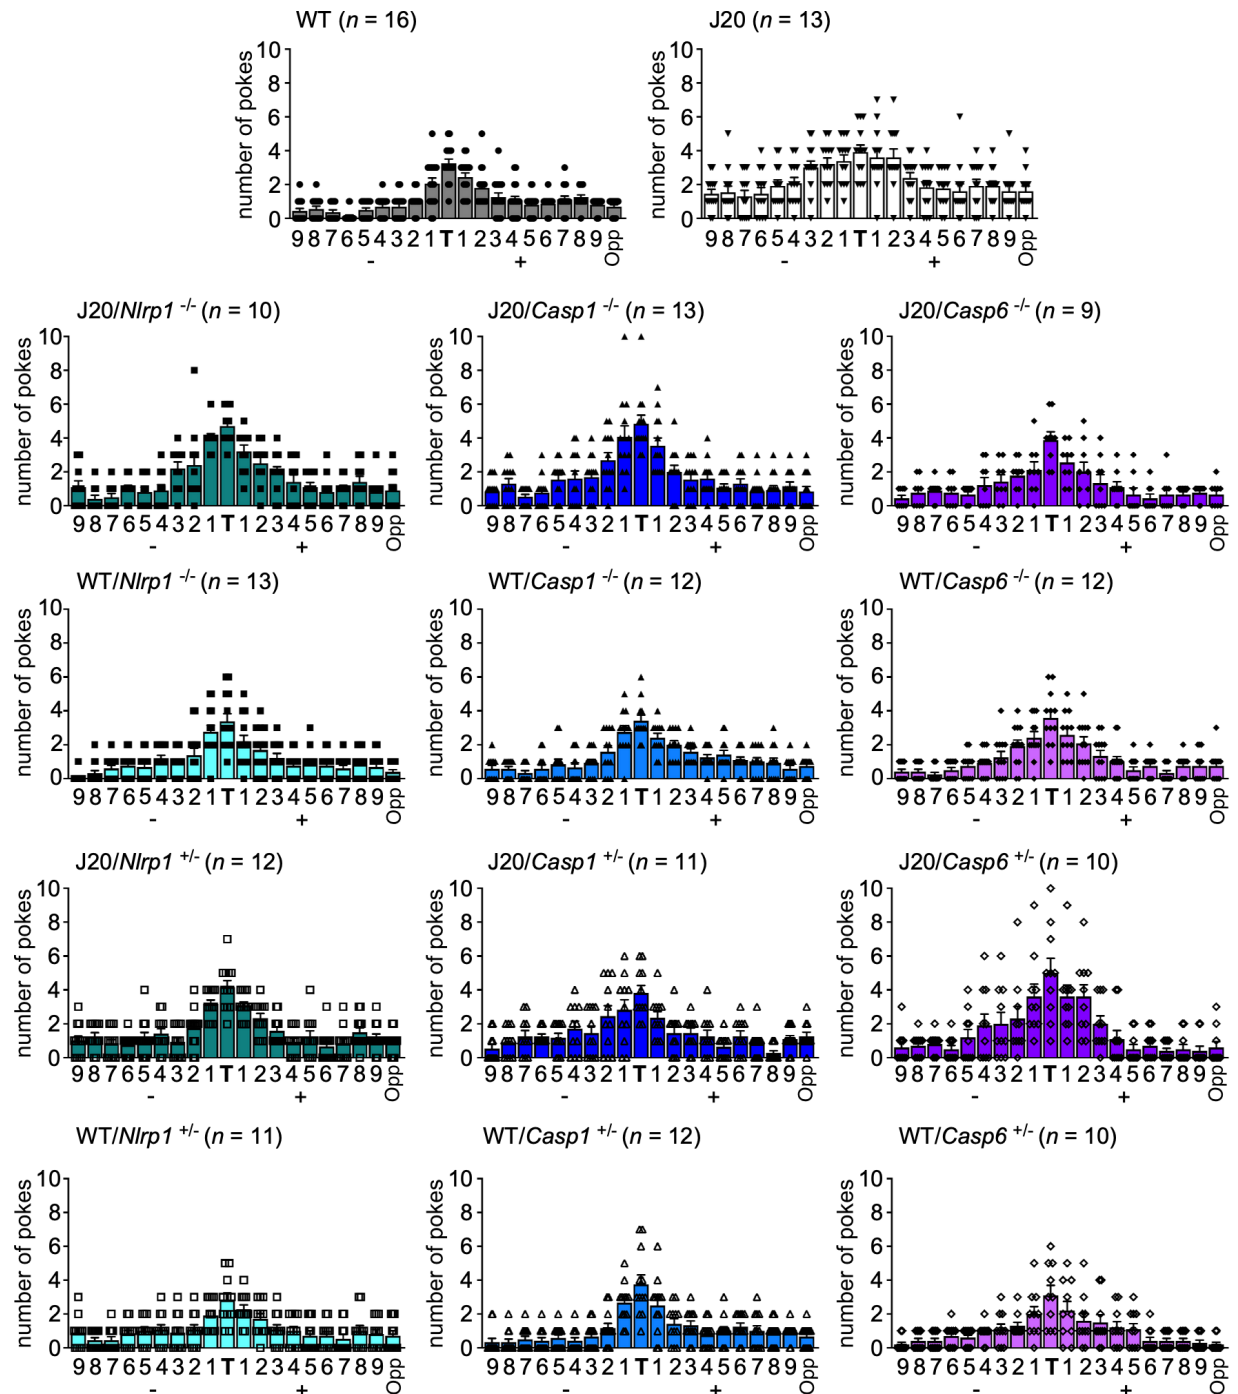

**Fig. S3.** *Nlrp1*, *Casp1*, or *Casp6* genetic ablation prevents cognitive deficits in J20 mice. Barnes maze distribution of pokes to each hole during the probe, where (T) indicates target hole. Bars represent mean  $\pm$  SEM of all mice per group; symbols denote performance of individual mice.

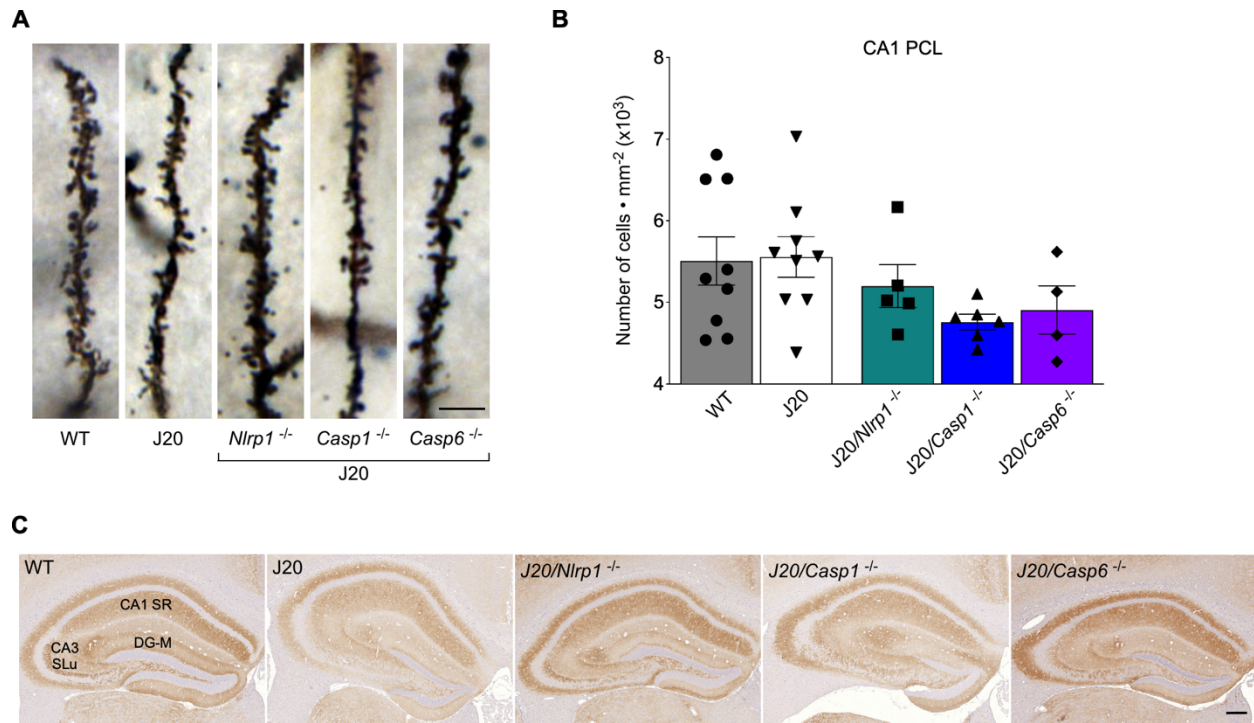

**Fig. S4. Synaptic density alterations after *Nlrp1*, *Casp1*, or *Casp6* genetic ablation in J20 mice. A** Representative Golgi-Cox-stained dendritic spines in the stratum radiatum (SR) of the hippocampal CA1. Scale bar = 5  $\mu$ m. **B** Cell density in the pyramidal cell layer (PCL) of the hippocampal CA1. **C** Representative synaptophysin staining of the hippocampus. CA1 SR = stratum radiatum of the CA1, CA3 SLu = stratum lucidum of the CA3, DG-M = molecular layer of the dentate gyrus. Scale bar = 200  $\mu$ m.

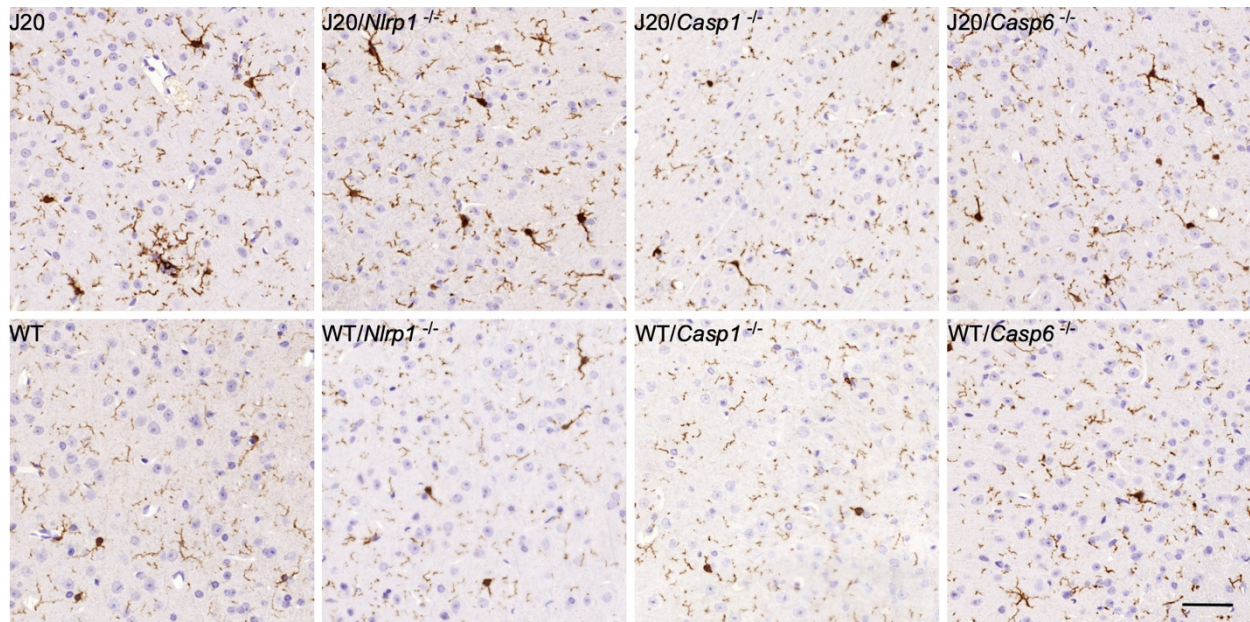

**Fig. S5.** *Nlrp1*, *Casp1*, or *Casp6* genetic ablation reduces microglia activation in J20 mice. Representative micrographs of Iba1<sup>+</sup> immunostained-microglia in the retrosplenial cortex. Scale bar = 50  $\mu$ m.



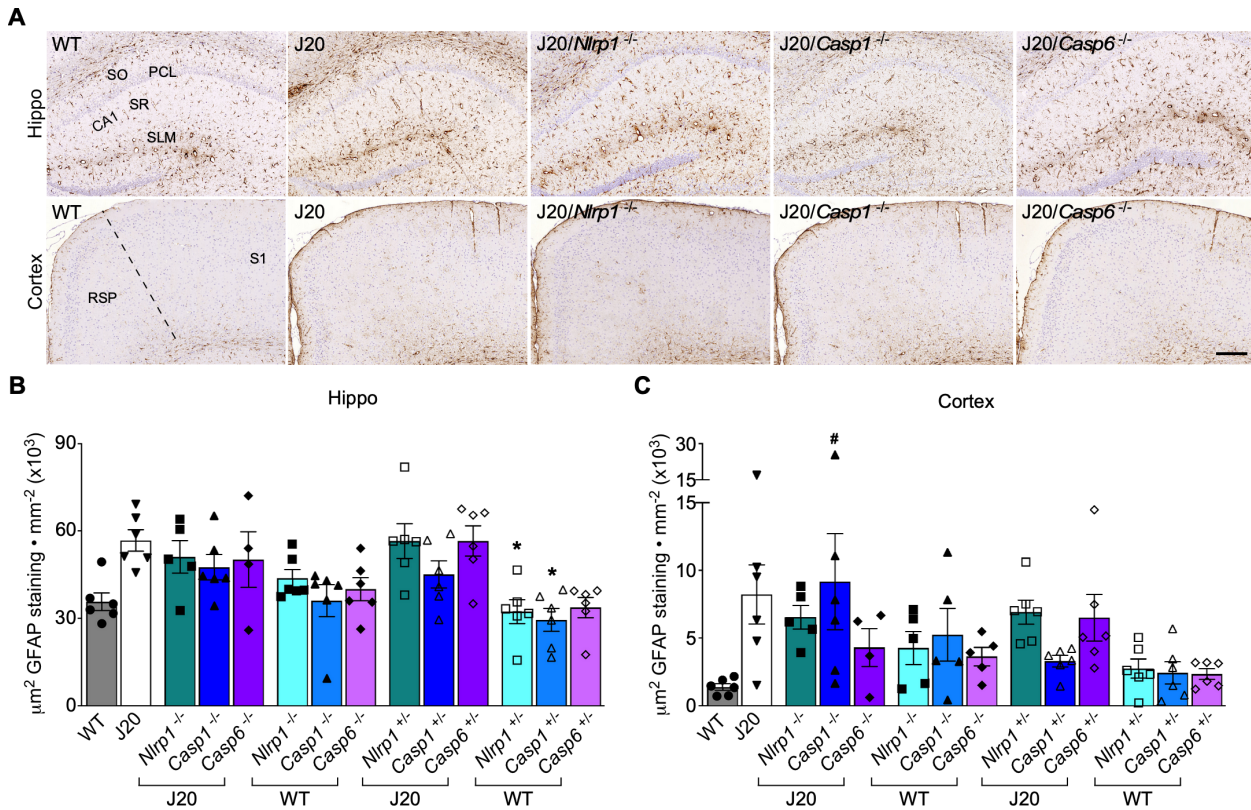

**Fig. S6. *Nlrp1*, *Casp1*, or *Casp6* genetic ablation does not alter GFAP<sup>+</sup> astrocytes in J20 mice.** **A** Representative GFAP<sup>+</sup> micrographs showing the stratum oriens (SO), pyramidal cell layer (PCL), SR, and stratum lacunosum-moleculare (SLM) of the hippocampal CA1 (top) and retrosplenial and S1 cortex (bottom). Scale bar = 200  $\mu\text{m}$ . **B** GFAP<sup>+</sup> staining density from the SO to the SLM in the hippocampal CA1 [F = 4.317, p = 0.000032]. **C** GFAP<sup>+</sup> staining density in the cortical retrosplenial and S1 area [F = 2.572, p = 0.0063]. Bars represent mean  $\pm$  SEM of all mice per group; symbols denote individual results. n = 6 WT, 6 J20, 5 J20/*Nlrp1*<sup>-/-</sup>, 6 J20/*Casp1*<sup>-/-</sup>, 4 J20/*Casp6*<sup>-/-</sup>, 6 WT/*Nlrp1*<sup>-/-</sup>, 6 WT/*Casp1*<sup>-/-</sup>, 6 WT/*Casp6*<sup>-/-</sup>, 6 J20/*Nlrp1*<sup>+/-</sup>, 6 J20/*Casp1*<sup>+/-</sup>, 6 J20/*Casp6*<sup>+/-</sup>, 6 WT/*Nlrp1*<sup>+/-</sup>, 6 WT/*Casp1*<sup>+/-</sup>, 6 WT/*Casp6*<sup>+/-</sup> for (B,C). One-way ANOVA, Bonferroni's post-hoc compared to WT (#) or J20 (\*). # or \* p < 0.05.



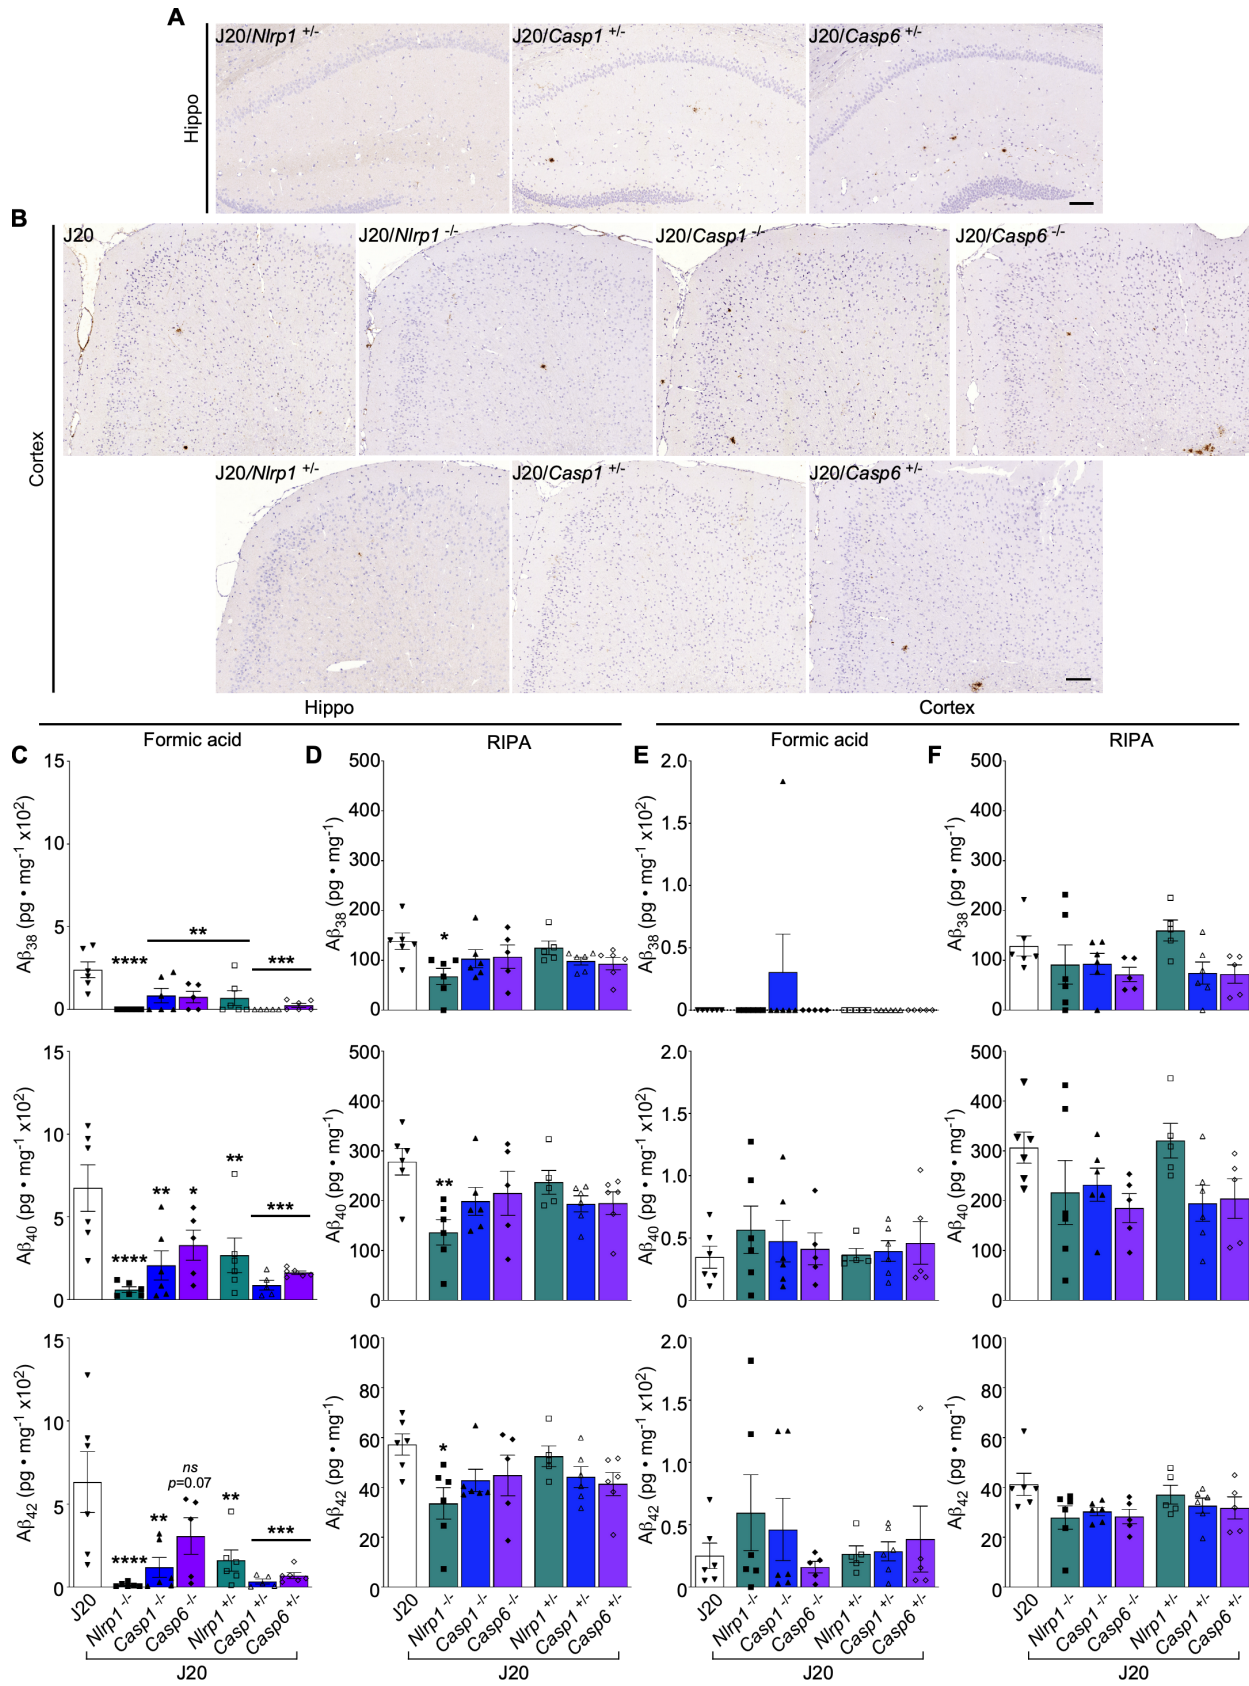

**Fig. S7. *Nlrp1*, *Casp1*, or *Casp6* genetic ablation prevents A $\beta$  deposition in J20 mice. A-B** Representative A $\beta$ -stained micrographs of the **A** hippocampus and **B** cortical retrosplenial and S1 area. Scale bars = 100  $\mu$ m. **C** Hippocampal formic acid-soluble A $\beta$ <sub>38</sub> [F = 6.346, p = 0.0001], A $\beta$ <sub>40</sub> [F = 6.198, p = 0.0001], and A $\beta$ <sub>42</sub> [F = 6.166, p = 0.0002] protein levels. **D** Hippocampal RIPA-soluble A $\beta$ <sub>38</sub>, A $\beta$ <sub>40</sub> [F = 2.733, p = 0.02], and A $\beta$ <sub>42</sub> protein levels. **E** Cortical formic acid-soluble A $\beta$ <sub>38</sub>, A $\beta$ <sub>40</sub>, and A $\beta$ <sub>42</sub> protein levels. **F** Cortical RIPA-soluble total A $\beta$ <sub>38</sub>, A $\beta$ <sub>40</sub>, and A $\beta$ <sub>42</sub> protein levels. Bars represent mean  $\pm$  SEM of all mice per group; symbols denote performance of individual mice. *n* = 6 J20, 6 J20/*Nlrp1*<sup>-/-</sup>, 6 J20/*Casp1*<sup>-/-</sup>, 5 J20/*Casp6*<sup>-/-</sup>, 6 J20/*Nlrp1*<sup>+/-</sup>, 6 J20/*Casp1*<sup>+/-</sup>, 6 J20/*Casp6*<sup>+/-</sup> for (C-F). One-way ANOVA, Dunnett's post-hoc compared to J20. \*p < 0.05, \*\*p < 0.01, \*\*\*p < 0.001, \*\*\*\*p < 0.0001.
